# Supplementary material
Source: Royal Society of Chemistry journal article supplement (doi:10.1039/d6ma00432f)
Supplement: d6ma00432f1.pdf [file d6ma00432f1.pdf]

## Supporting Information

### Structure-Property Relationships in Heteroatom-Doped g-C<sub>3</sub>N<sub>4</sub> Nanocarriers for Cimetidine: A Computational Study

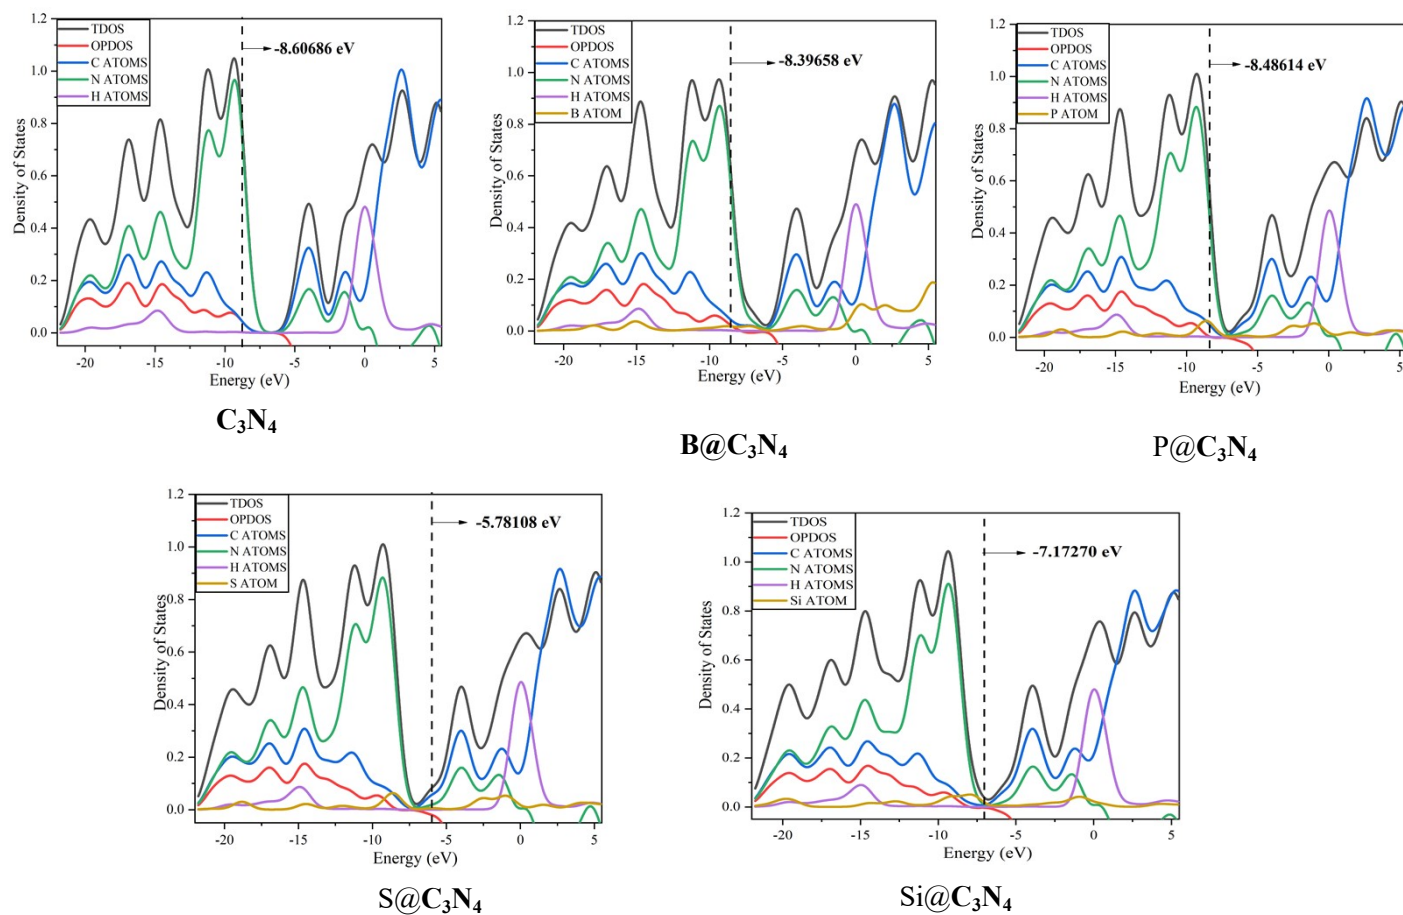

**Figure S1.** Density of states (DOS) spectra for pristine and X-doped C<sub>3</sub>N<sub>4</sub> surfaces, illustrating the effects of heteroatom doping on electronic structure, band alignment, and surface reactivity.

**Table S1.** NBO second-order perturbation energies ( $E^{(2)}$ ), donor–acceptor interactions and associated orbital transitions for pristine and X-doped C<sub>3</sub>N<sub>4</sub>, highlighting key charge-transfer pathways.

| Compound | Donor | Acceptor | $E^{(2)}$ kcal/mol | $E(j)-E(i)$ a.u | $F(i,j)$ a.u | Transitions |
|----------|-------|----------|--------------------|-----------------|--------------|-------------|
|----------|-------|----------|--------------------|-----------------|--------------|-------------|

|                                          |                                   |                                   | Surfaces            |      |       |        |
|------------------------------------------|-----------------------------------|-----------------------------------|---------------------|------|-------|--------|
| <b>B@C<sub>3</sub>N<sub>4</sub></b>      | N <sub>53</sub>                   | C <sub>9</sub> -N <sub>49</sub>   | 22.42               | 0.35 | 0.081 | LP→π*  |
|                                          | N <sub>21</sub>                   | C <sub>12</sub> -N <sub>50</sub>  | 21.57               | 0.34 | 0.077 | LP→π*  |
|                                          | N <sub>53</sub>                   | C <sub>10</sub> -N <sub>46</sub>  | 20.43               | 0.36 | 0.078 | LP→π*  |
| <b>C<sub>3</sub>N<sub>4</sub></b>        | N <sub>54</sub>                   | C <sub>9</sub> -N <sub>49</sub>   | 22.29               | 0.35 | 0.081 | LP→π*  |
|                                          | N <sub>53</sub>                   | C <sub>16</sub> -N <sub>41</sub>  | 21.95               | 0.35 | 0.080 | LP→π*  |
|                                          | N <sub>53</sub>                   | C <sub>14</sub> -N <sub>43</sub>  | 20.68               | 0.36 | 0.079 | LP→π*  |
| <b>P@C<sub>3</sub>N<sub>4</sub></b>      | P <sub>54</sub>                   | C <sub>16</sub> -N <sub>41</sub>  | 106.82              | 0.14 | 0.123 | LP→π*  |
|                                          | P <sub>54</sub>                   | C <sub>15</sub> -N <sub>45</sub>  | 101.04              | 0.15 | 0.122 | LP→π*  |
|                                          | P <sub>54</sub>                   | C <sub>14</sub> -N <sub>43</sub>  | 100.44              | 0.15 | 0.121 | LP→π*  |
| <b>S@C<sub>3</sub>N<sub>4</sub></b>      | C <sub>17</sub>                   | C <sub>14</sub> -N <sub>40</sub>  | 101.29              | 0.08 | 0.120 | LP→π*  |
|                                          | N <sub>45</sub>                   | C <sub>15</sub> -N <sub>44</sub>  | 85                  | 0.10 | 0.118 | LP→π*  |
|                                          | C <sub>17</sub>                   | C <sub>16</sub> -N <sub>41</sub>  | 31.24               | 0.13 | 0.088 | LP→π*  |
| <b>Si@C<sub>3</sub>N<sub>4</sub></b>     | N <sub>53</sub>                   | C <sub>9</sub> -N <sub>49</sub>   | 11.14               | 0.35 | 0.081 | LP→π*  |
|                                          | N <sub>53</sub>                   | C <sub>8</sub> -N <sub>51</sub>   | 10.52               | 0.36 | 0.076 | LP→π*  |
|                                          | N <sub>51</sub>                   | C <sub>8</sub> -N <sub>53</sub>   | 9.29                | 0.60 | 0.095 | LP→σ*  |
|                                          |                                   |                                   | <b>Interactions</b> |      |       |        |
| <b>Cmt-B@C<sub>3</sub>N<sub>4</sub></b>  | N <sub>53</sub>                   | C <sub>63</sub> -C <sub>64</sub>  | 46.62               | 0.43 | 0.129 | LP→π*  |
|                                          | C <sub>55</sub> -C <sub>59</sub>  | C <sub>56</sub> -N <sub>73</sub>  | 26.23               | 0.25 | 0.72  | π→π*   |
|                                          | O <sub>75</sub>                   | C <sub>74</sub> -N <sub>76</sub>  | 24.56               | 0.62 | 0.111 | LP→σ*  |
| <b>Cmt-C<sub>3</sub>N<sub>4</sub></b>    | O <sub>83</sub>                   | C <sub>81</sub> -O <sub>82</sub>  | 45.95               | 0.33 | 0.111 | LP→π*  |
|                                          | O <sub>82</sub>                   | C <sub>81</sub> -O <sub>83</sub>  | 29.77               | 0.61 | 0.122 | LP→π*  |
|                                          | C <sub>58</sub> -C <sub>59</sub>  | C <sub>57</sub> -N <sub>73</sub>  | 26.83               | 0.26 | 0.076 | π→π*   |
| <b>Cmt-P@C<sub>3</sub>N<sub>4</sub></b>  | N <sub>53</sub>                   | C <sub>63</sub> - C <sub>64</sub> | 14.66               | 0.42 | 0.072 | LP→π*  |
|                                          | C <sub>64</sub> - H <sub>70</sub> | C <sub>10</sub> - N <sub>53</sub> | 1.08                | 0.79 | 0.026 | σ→σ*   |
| <b>Cmt-S@C<sub>3</sub>N<sub>4</sub></b>  | C <sub>17</sub>                   | C <sub>14</sub> -N <sub>40</sub>  | 108.20              | 0.08 | 0.121 | LP→π*  |
|                                          | N <sub>45</sub>                   | C <sub>15</sub> -N <sub>44</sub>  | 86.56               | 0.10 | 0.118 | LP→π*  |
|                                          | C <sub>17</sub>                   | C <sub>16</sub> -N <sub>40</sub>  | 31.10               | 0.12 | 0.087 | LP→π*  |
| <b>Cmt-Si@C<sub>3</sub>N<sub>4</sub></b> | N <sub>44</sub>                   | C <sub>13</sub> -N <sub>43</sub>  | 111.86              | 0.12 | 0.149 | LP→π*  |
|                                          | C <sub>14</sub>                   | Si <sub>54</sub>                  | 82.29               | 0.16 | 0.150 | LP→LP* |
|                                          | C <sub>13</sub> -N <sub>43</sub>  | C <sub>14</sub>                   | 50.28               | 0.14 | 0.128 | π→LP   |

**Table S2.** Mulliken atomic charge distribution of isolated cimetidine (Cmt) and adsorbed cimetidine on pristine and X-doped C<sub>3</sub>N<sub>4</sub> surfaces (X = B, P, S, and Si). The calculated charges provide insight into charge redistribution and electron transfer occurring during adsorption.

| Atoms | Cmt/e | Cmt-C <sub>3</sub> N <sub>4</sub> /e | Cmt-B@C <sub>3</sub> N <sub>4</sub> /e | Cmt-P@C <sub>3</sub> N <sub>4</sub> /e | Cmt-S@C <sub>3</sub> N <sub>4</sub> /e | Cmt-Si@C <sub>3</sub> N <sub>4</sub> /e |
|-------|-------|--------------------------------------|----------------------------------------|----------------------------------------|----------------------------------------|-----------------------------------------|
|-------|-------|--------------------------------------|----------------------------------------|----------------------------------------|----------------------------------------|-----------------------------------------|

|              |        |        |        |        |        |        |
|--------------|--------|--------|--------|--------|--------|--------|
| <b>C1</b>    | 0.020  | 0.024  | 0.031  | 0.105  | 0.017  | 0.026  |
| <b>C2</b>    | 0.050  | 0.044  | 0.043  | 0.009  | 0.049  | 0.049  |
| <b>C3</b>    | 0.012  | 0.002  | -0.004 | -0.108 | 0.017  | 0.004  |
| <b>C4</b>    | 0.178  | 0.175  | 0.181  | 0.116  | 0.171  | 0.168  |
| <b>C5</b>    | -0.015 | -0.006 | 0.000  | -0.042 | -0.014 | 0.002  |
| <b>C6</b>    | 0.059  | 0.058  | 0.058  | 0.101  | 0.051  | 0.063  |
| <b>C7</b>    | -0.011 | -0.018 | -0.036 | -0.014 | -0.014 | -0.027 |
| <b>C8</b>    | 0.069  | 0.068  | 0.078  | 0.056  | 0.068  | 0.077  |
| <b>C9</b>    | 0.021  | 0.030  | 0.030  | -0.003 | 0.038  | -0.008 |
| <b>C10</b>   | 0.016  | 0.034  | 0.109  | 0.005  | -0.043 | 0.081  |
| <b>C11</b>   | -0.009 | -0.024 | -0.044 | -0.006 | 0.027  | -0.043 |
| <b>H12</b>   | 0.019  | 0.022  | 0.020  | -0.007 | 0.021  | 0.018  |
| <b>H13</b>   | -0.014 | -0.012 | -0.003 | -0.002 | -0.007 | 0.001  |
| <b>H14</b>   | -0.009 | -0.010 | -0.015 | -0.024 | -0.013 | -0.012 |
| <b>H15</b>   | -0.007 | -0.004 | -0.003 | -0.002 | -0.014 | -0.004 |
| <b>H16</b>   | -0.002 | -0.010 | -0.063 | 0.006  | 0.047  | 0.011  |
| <b>H17</b>   | -0.018 | -0.010 | -0.007 | -0.016 | -0.027 | -0.016 |
| <b>C118</b>  | -0.093 | -0.088 | -0.083 | -0.085 | -0.089 | -0.083 |
| <b>N19</b>   | -0.162 | -0.167 | -0.167 | -0.115 | -0.165 | -0.168 |
| <b>C20</b>   | 0.133  | 0.137  | 0.149  | 0.155  | 0.137  | 0.149  |
| <b>O21</b>   | -0.172 | -0.171 | -0.179 | -0.339 | -0.184 | -0.179 |
| <b>N22</b>   | -0.234 | -0.233 | -0.232 | -0.121 | -0.231 | -0.234 |
| <b>H23</b>   | 0.124  | 0.125  | 0.127  | 0.143  | 0.127  | 0.127  |
| <b>C24</b>   | 0.167  | 0.165  | 0.163  | 0.186  | 0.165  | 0.163  |
| <b>H25</b>   | 0.031  | 0.033  | 0.035  | 0.043  | 0.034  | 0.036  |
| <b>H26</b>   | 0.048  | 0.049  | 0.052  | 0.050  | 0.045  | 0.053  |
| <b>C27</b>   | 0.113  | 0.114  | 0.114  | 0.103  | 0.115  | 0.114  |
| <b>O28</b>   | -0.227 | -0.226 | -0.225 | -0.219 | -0.223 | -0.226 |
| <b>O29</b>   | -0.199 | -0.199 | -0.198 | -0.185 | -0.199 | -0.197 |
| <b>H30</b>   | 0.186  | 0.187  | 0.188  | 0.175  | 0.188  | 0.188  |
| <b>O31</b>   | -0.262 | -0.264 | -0.247 | -0.176 | -0.264 | -0.241 |
| <b>H32</b>   | 0.188  | 0.187  | 0.195  | 0.202  | 0.176  | 0.185  |
| <b>Total</b> | 0.000  | 0.012  | 0.068  | -0.011 | 0.004  | 0.075  |

**Table S3.** Literature-supported comparison of cimetidine adsorption on nanocarriers

| <b>System</b>                         | <b>Adsorption Energy (eV)</b> | <b>Dominant Interaction</b> | <b>Structural Stability</b> | <b>Literature Basis</b> |
|---------------------------------------|-------------------------------|-----------------------------|-----------------------------|-------------------------|
| doped g-C <sub>3</sub> N <sub>4</sub> | -3.02 to -3.76                | H-bonding +                 | High                        | Present                 |

|                         |                                          |                                        |                                            |                      |
|-------------------------|------------------------------------------|----------------------------------------|--------------------------------------------|----------------------|
| (this work)             |                                          | electrostatic + charge transfer        |                                            | study                |
| Graphene oxide (GO)     | $\sim -0.5$ to $-2.5$                    | H-bonding + vdW                        | Moderate                                   | [41]                 |
| Carbon nanotubes (CNTs) | $\sim -0.1$ to $-1.5$                    | $\pi$ - $\pi$ stacking (physisorption) | High mechanical, low functional tunability | [42]                 |
| MOFs                    | $\sim -0.5$ to $-4.5$ (system dependent) | Coordination + electrostatic           | Variable (often moisture sensitive)        | literature consensus |

**Table S4.** QTAIM topological parameters for Cmt adsorption on pristine and X-doped C<sub>3</sub>N<sub>4</sub>, including electron density  $\rho(\mathbf{r})$ ,

| System                              | CP  | Bond label                       | $\rho(\mathbf{r})$ | $\nabla^2\rho(\mathbf{r})$ | G(r) | K(r)  | V(r)  | H(r)  | G(r)/V(r) | ELF  | $\epsilon$ | $\lambda_2$ | $\lambda_3$ | $\lambda_1/\lambda_3$ |
|-------------------------------------|-----|----------------------------------|--------------------|----------------------------|------|-------|-------|-------|-----------|------|------------|-------------|-------------|-----------------------|
| Cmt-C <sub>3</sub> N <sub>4</sub>   | 147 | C <sub>18</sub> -O <sub>82</sub> | 0.67               | 0.26                       | 0.55 | -0.12 | -0.43 | 0.12  | -1.28     | 0.16 | 2.76       | -0.13       | 0.33        | -1.45                 |
|                                     | 137 | C <sub>16</sub> -N <sub>76</sub> | 0.54               | 0.21                       | 0.40 | -0.13 | -0.27 | 0.13  | -1.48     | 0.14 | 0.31       | -0.16       | 0.25        | -0.80                 |
|                                     | 107 | N <sub>19</sub> -O <sub>75</sub> | 0.11               | 0.44                       | 0.45 | -0.16 | -0.79 | 0.16  | -0.57     | 0.29 | 1.26       | -0.39       | 0.57        | -1.56                 |
|                                     | 181 | C <sub>15</sub> -H <sub>79</sub> | 0.18               | 0.79                       | 0.14 | -0.60 | -0.77 | 0.60  | -0.18     | 0.33 | 0.39       | -0.46       | 0.90        | -0.70                 |
|                                     | 198 | N <sub>50</sub> -H <sub>86</sub> | 0.50               | 0.11                       | 0.33 | 0.54  | -0.38 | -0.54 | -0.87     | 0.26 | 0.04       | -0.85       | 0.28        | -3.18                 |
|                                     | 100 | N <sub>52</sub> -N <sub>73</sub> | 0.28               | 0.95                       | 0.20 | -0.40 | -0.16 | 0.40  | -1.25     | 0.66 | 0.71       | -0.95       | 0.12        | -1.33                 |
|                                     | 117 | N <sub>37</sub> -H <sub>68</sub> | 0.14               | 0.39                       | 0.89 | -0.71 | -0.82 | 0.71  | -1.09     | 0.64 | 0.03       | -0.14       | 0.67        | -0.22                 |
|                                     | 156 | N <sub>23</sub> -C <sub>66</sub> | 0.57               | 0.19                       | 0.37 | -0.98 | -0.27 | 0.98  | -1.37     | 0.19 | 0.50       | -0.23       | 0.25        | -1.40                 |
| Cmt-P@C <sub>3</sub> N <sub>4</sub> | 125 | N <sub>36</sub> -O <sub>75</sub> | 0.94               | 0.31                       | 0.71 | -0.80 | -0.63 | 0.80  | -1.13     | 0.28 | 0.07       | -0.72       | 0.46        | -1.67                 |
|                                     | 103 | N <sub>52</sub> -N <sub>73</sub> | 0.82               | 0.25                       | 0.54 | -0.79 | -0.46 | 0.79  | -1.17     | 0.31 | 0.57       | -0.39       | 0.35        | -1.74                 |
|                                     | 176 | P <sub>54</sub> -H <sub>86</sub> | 0.67               | 0.16                       | 0.35 | -0.37 | -0.32 | 0.37  | -1.09     | 0.35 | 0.13       | -0.50       | 0.26        | -2.15                 |
| Cmt-S@C <sub>3</sub> N <sub>4</sub> | 211 | N <sub>48</sub> -H <sub>69</sub> | 0.31               | 0.11                       | 0.22 | -0.60 | -0.16 | 0.60  | -1.38     | 0.69 | 0.44       | -0.18       | 0.16        | -1.56                 |
|                                     | 199 | N <sub>49</sub> -C <sub>64</sub> | 0.65               | 0.21                       | 0.41 | -0.11 | -0.29 | 0.11  | -1.41     | 0.24 | 1.97       | -0.15       | 0.27        | -1.59                 |

Laplacian  $\nabla^2\rho(\mathbf{r})$ , kinetic energy density G(r), potential energy density V(r), and ellipticity  $\epsilon$  at bond critical points. *All parameters are recorded in atomic units (a.u).*

|                                      |     |                                   |      |       |      |       |        |       |       |      |      |       |      |       |
|--------------------------------------|-----|-----------------------------------|------|-------|------|-------|--------|-------|-------|------|------|-------|------|-------|
|                                      | 181 | H <sub>22</sub> -C <sub>65</sub>  | 0.67 | 0.20  | 0.41 | -0.96 | -0.32  | 0.96  | -1.28 | 0.26 | 1.93 | -0.21 | 0.29 | -2.10 |
|                                      | 90  | H <sub>27</sub> -O <sub>75</sub>  | 0.26 | 0.92  | 0.21 | -0.25 | -0.18  | 0.25  | -1.17 | 0.97 | 0.03 | -0.35 | 0.16 | -2.31 |
|                                      | 157 | N <sub>44</sub> -N <sub>67</sub>  | 0.11 | 0.35  | 0.76 | -0.10 | -0.66  | 0.10  | -1.15 | 0.45 | 0.11 | -0.10 | 0.56 | -0.20 |
| Cmt-Si@C <sub>3</sub> N <sub>4</sub> | 191 | N <sub>49</sub> -C <sub>64</sub>  | 0.61 | 0.19  | 0.33 | -0.97 | -0.29  | 0.97  | -1.14 | 0.23 | 0.13 | -0.25 | 0.25 | -1.57 |
|                                      | 158 | N <sub>53</sub> -C <sub>63</sub>  | 0.57 | 0.17  | 0.5  | -0.67 | -0.28  | 0.6   | -1.79 | 0.21 | 1.41 | -0.14 | 0.21 | -1.50 |
|                                      | 189 | N <sub>50</sub> -C <sub>65</sub>  | 0.67 | 0.20  | 0.41 | -0.83 | -0.33  | 0.83  | -1.24 | 0.27 | 0.59 | -0.25 | 0.26 | -1.47 |
|                                      | 203 | N <sub>43</sub> -H <sub>71</sub>  | 0.52 | 0.16  | 0.32 | -0.77 | -0.24  | 0.77  | -1.33 | 0.20 | 2.57 | -0.78 | 0.19 | -1.37 |
|                                      | 105 | N <sub>47</sub> -C <sub>172</sub> | 0.48 | 0.16  | 0.33 | -0.60 | -0.27  | 0.60  | -1.22 | 0.14 | 1.20 | -0.12 | 0.19 | -2.03 |
|                                      | 217 | Si <sub>54</sub> -H <sub>86</sub> | 0.86 | 0.19  | 0.43 | -0.53 | -0.38  | 0.53  | -1.13 | 0.55 | 0.15 | -0.56 | 0.32 | -0.16 |
|                                      | 205 | N <sub>19</sub> -O <sub>75</sub>  | 0.11 | 0.46  | 0.98 | -0.18 | -0.80  | 0.18  | -1.23 | 0.27 | 0.94 | -0.54 | 0.61 | -1.57 |
| Cmt-B@C <sub>3</sub> N <sub>4</sub>  | 201 | N <sub>49</sub> -H <sub>70</sub>  | 0.51 | 0.15  | 0.34 | -0.46 | -0.29  | 0.46  | -1.17 | 0.16 | 0.18 | -0.37 | 0.23 | -1.91 |
|                                      | 179 | N <sub>21</sub> -H <sub>71</sub>  | 0.55 | 0.21  | 0.42 | -0.11 | -0.31  | 0.11  | -1.35 | 0.14 | 0.36 | -0.30 | 0.28 | -1.46 |
|                                      | 161 | N <sub>44</sub> -H <sub>67</sub>  | 0.67 | 0.20  | 0.44 | -0.73 | -0.37  | 0.73  | -1.19 | 0.24 | 0.03 | -0.56 | 0.32 | -1.81 |
|                                      | 134 | N <sub>45</sub> -H <sub>86</sub>  | 0.59 | 0.11  | 0.39 | 0.11  | -0.50  | -0.11 | -0.78 | 0.31 | 0.03 | -0.11 | 0.33 | -0.33 |
|                                      | 91  | H <sub>27</sub> -O <sub>75</sub>  | 0.30 | 0.112 | 0.24 | -0.27 | -0.211 | 0.227 | -1.14 | 0.11 | 0.03 | -0.42 | 0.19 | -2.32 |

**Table S5.** Molecular dynamics energy statistics for cimetidine (Cmt) adsorbed on pristine and X-doped C<sub>3</sub>N<sub>4</sub> (X = B, P, S, Si) at simulation times of 100 ps, including total, potential, and kinetic energies, temperature, and their corresponding averages and standard deviations under NVT conditions at 298 K.

| <b>Cmt-C<sub>3</sub>N<sub>4</sub></b>    |                |              |          |                    | <b>Cmt-B@C<sub>3</sub>N<sub>4</sub></b> |                |              |          |                    |
|------------------------------------------|----------------|--------------|----------|--------------------|-----------------------------------------|----------------|--------------|----------|--------------------|
| Parameters                               | Initial energy | Final energy | Average  | Standard deviation | Parameters                              | Initial energy | Final energy | Average  | Standard deviation |
| Tot. energy (kcal/mol)                   | 11898.32       | 15232.67     | 15400.73 | 11898.32           | Tot. energy (kcal/mol)                  | 12906.68       | 15287.7      | 15554    | 598.648            |
| Pot. energy (kcal/mol)                   | 6658.353       | 9911.045     | 10160.83 | 6658.353           | Pot. energy (kcal/mol)                  | 7666.719       | 10151.71     | 10314.01 | 414.577            |
| Kin. energy (kcal/mol)                   | 5239.965       | 5321.624     | 5239.892 | 5239.965           | Kin. energy (kcal/mol)                  | 5239.965       | 5135.99      | 5239.999 | 261.04             |
| Temperature (K)                          | 298            | 302.644      | 297.996  | 15.445             | Temperature (K)                         | 298            | 292.087      | 298.002  | 14.845             |
| <b>Cmt-P@C<sub>3</sub>N<sub>4</sub></b>  |                |              |          |                    | <b>Cmt-S@C<sub>3</sub>N<sub>4</sub></b> |                |              |          |                    |
| Parameters                               | Initial energy | Final energy | Average  | Standard deviation | Parameters                              | Initial energy | Final energy | Average  | Standard deviation |
| Tot. energy (kcal/mol)                   | 65366.64       | 15544.07     | 15729.78 | 1306.262           | Tot. energy (kcal/mol)                  | 14059.57       | 17412.11     | 17499.65 | 594.64             |
| Pot. energy (kcal/mol)                   | 60126.68       | 10262.95     | 10489.82 | 879.032            | Pot. energy (kcal/mol)                  | 8819.606       | 12024.91     | 12259.72 | 395.498            |
| Kin. energy (kcal/mol)                   | 5239.965       | 5281.121     | 5239.965 | 569.108            | Kin. energy (kcal/mol)                  | 5239.965       | 5387.205     | 5239.926 | 266.82             |
| Temperature (K)                          | 298            | 300.341      | 298      | 32.366             | Temperature (K)                         | 298            | 306.374      | 297.998  | 15.174             |
| <b>Cmt-Si@C<sub>3</sub>N<sub>4</sub></b> |                |              |          |                    |                                         |                |              |          |                    |
| Parameters                               | Initial energy | Final energy | Average  | Standard deviation |                                         |                |              |          |                    |
| Tot. energy (kcal/mol)                   | 11299.34       | 14830.03     | 15046.53 | 588.015            |                                         |                |              |          |                    |
| Pot. energy (kcal/mol)                   | 6059.375       | 9575.306     | 9806.558 | 371.34             |                                         |                |              |          |                    |
| Kin. energy (kcal/mol)                   | 5239.965       | 5254.723     | 5239.976 | 272.66             |                                         |                |              |          |                    |
| Temperature (K)                          | 298            | 298.839      | 298.001  | 15.506             |                                         |                |              |          |                    |

**Table S6.** Molecular dynamics energy parameters for cimetidine (Cmt) adsorbed on pristine and X-doped C<sub>3</sub>N<sub>4</sub> surfaces (X = B, P, S, Si) obtained from 500 ps NVT simulations at 298 K, showing initial, final, and average values of total, potential, and kinetic energies, as well as temperature and corresponding standard deviations, calculated using the Universal Force Field (UFF).

| <b>Cmt-C<sub>3</sub>N<sub>4</sub></b>    |                |              |          |                    | <b>Cmt-B@C<sub>3</sub>N<sub>4</sub></b> |                |              |          |                    |
|------------------------------------------|----------------|--------------|----------|--------------------|-----------------------------------------|----------------|--------------|----------|--------------------|
| Parameters                               | Initial energy | Final energy | Average  | Standard deviation | Parameters                              | Initial energy | Final energy | Average  | Standard deviation |
| Tot. energy (kcal/mol)                   | 11898.32       | 15016.01     | 15121.2  | 605.835            | Tot. energy (kcal/mol)                  | 12906.68       | 15125.58     | 15301.54 | 354.006            |
| Pot. energy (kcal/mol)                   | 6658.353       | 9765.863     | 9881.237 | 403.077            | Pot. energy (kcal/mol)                  | 7666.719       | 9867.696     | 10061.58 | 291.304            |
| Kin. energy (kcal/mol)                   | 5239.965       | 5250.144     | 5239.96  | 271.579            | Kin. energy (kcal/mol)                  | 5239.965       | 5257.883     | 5239.962 | 127.82             |
| Temperature (K)                          | 298            | 298.579      | 298      | 7.498              | Temperature (K)                         | 298            | 299.019      | 298      | 7.269              |
| <b>Cmt-P@C<sub>3</sub>N<sub>4</sub></b>  |                |              |          |                    | <b>Cmt-S@C<sub>3</sub>N<sub>4</sub></b> |                |              |          |                    |
| Parameters                               | Initial energy | Final energy | Average  | Standard deviation | Parameters                              | Initial energy | Final energy | Average  | Standard deviation |
| Tot. energy (kcal/mol)                   | 65366.64       | 15163.13     | 15331.26 | 601.117            | Tot. energy (kcal/mol)                  | 14059.57       | 17051.38     | 17181.6  | 331.84             |
| Pot. energy (kcal/mol)                   | 60126.68       | 9939.985     | 10091.3  | 414.439            | Pot. energy (kcal/mol)                  | 8819.606       | 11782.82     | 11941.63 | 254.832            |
| Kin. energy (kcal/mol)                   | 5239.965       | 5223.14      | 5239.958 | 261.208            | Kin. energy (kcal/mol)                  | 5239.965       | 5268.561     | 5239.967 | 133.759            |
| Temperature (K)                          | 298            | 297.043      | 298      | 14.855             | Temperature (K)                         | 298            | 299.626      | 298      | 7.607              |
| <b>Cmt-Si@C<sub>3</sub>N<sub>4</sub></b> |                |              |          |                    |                                         |                |              |          |                    |
| Parameters                               | Initial energy | Final energy | Average  | Standard deviation |                                         |                |              |          |                    |
| Tot. energy (kcal/mol)                   | 11299.34       | 14493.4      | 14688.06 | 340.046            |                                         |                |              |          |                    |
| Pot. energy (kcal/mol)                   | 6059.375       | 9291.734     | 9448.091 | 269.642            |                                         |                |              |          |                    |
| Kin. energy (kcal/mol)                   | 5239.965       | 5201.665     | 5239.965 | 130.772            |                                         |                |              |          |                    |
| Temperature (K)                          | 298            | 295.822      | 298      | 7.437              |                                         |                |              |          |                    |
